# Supplementary material
Source: PubMed Central journal article supplement (PMC8952184)
Supplement: bloodBLD2021013523-suppl1.pdf [file bloodBLD2021013523-suppl1.pdf]

## **Supplementary Methods and Results**

**Supplemental Table 1: Diagnostic categories based on clinical features<sup>^</sup>**

| Category | Description                                                                                                                                                                                                                                                                                                                                                                                                                                                                                                                                                                                                                                                                                                                             | # patients |
|----------|-----------------------------------------------------------------------------------------------------------------------------------------------------------------------------------------------------------------------------------------------------------------------------------------------------------------------------------------------------------------------------------------------------------------------------------------------------------------------------------------------------------------------------------------------------------------------------------------------------------------------------------------------------------------------------------------------------------------------------------------|------------|
| 1        | Dyskeratosis congenita (DC) diagnosis solely based on the presence of at least 2/3 features of the diagnostic triad without telomere length assay or genetic testing report.                                                                                                                                                                                                                                                                                                                                                                                                                                                                                                                                                            | 1          |
| 2        | Any one feature of the triad plus bone marrow hypoplasia plus presence of at least one other physical finding consistent with DC related telomere biology disorders (DC/TBD) without telomere length assay or genetic testing report.                                                                                                                                                                                                                                                                                                                                                                                                                                                                                                   | 5          |
| 3        | Patients meeting the clinical criteria of Hoyeraal Hreidarsson syndrome, Revesz syndrome or Coats plus based on medical, personal or family member report. Five were included based on personal or family member report only, not specific medical record review.                                                                                                                                                                                                                                                                                                                                                                                                                                                                       | 32         |
| 4        | Individuals with two or more features seen in DC/TBDs associated with very short telomeres.                                                                                                                                                                                                                                                                                                                                                                                                                                                                                                                                                                                                                                             | 24         |
| 5        | Individuals with one or more features (any triad feature, bone marrow failure, pulmonary fibrosis, liver disease) seen in DC (+/- telomere length result) and the presence of a pathogenic variant in a DC/TBD-associated gene. Three were included based on personal or family member report only.                                                                                                                                                                                                                                                                                                                                                                                                                                     | 110        |
| 6        | Individuals with a heterozygous pathogenic variant in a DC/TBD-associated gene in the absence of any reported clinical features (any triad feature, bone marrow failure, pulmonary fibrosis, liver disease).*<br>The clinical information for 22 Field Cohort participants was incomplete. Therefore, they were included in this category but may have had unreported TBD-associated features.<br>Twenty-five family members with heterozygous pathogenic variants and the index case having autosomal recessive disease were included, provided the affected genes had previously been implicated in autosomal dominant disease according to OMIM ( <a href="https://www.omim.org/">https://www.omim.org/</a> ) and literature review. | 47         |
| 7        | Family members with the DC triad and/or pulmonary fibrosis and/or bone marrow failure (with or without other DC/TBD related features) were included if a pathogenic variant was proven in a first-degree family member. Five were included based on personal or family member report only, not specific medical record review.                                                                                                                                                                                                                                                                                                                                                                                                          | 12         |

<sup>^</sup> Modified from Dokal et al, Eur J Hum Genet 2015.<sup>1</sup>

Clinical diagnoses were confirmed through physical examination (Clinic Cohort), or based on medical records, photographs of participants, and/or personal reports by participants or family members through the Individual Information Questionnaire (Field Cohort).

\* Exclusion: Carriers of heterozygous variants in genes associated exclusively with AR disease (*WRAP53*, *NOP10*, *NHP2*, *STN1*, *CTC1*, *POT1*) according to OMIM (<https://www.omim.org/>) and literature review at time of data freeze (05/31/2019).

Hoyeraal Hreidarsson syndrome: Cerebellar hypoplasia, immunodeficiency, developmental delay, progressive bone marrow failure, and intrauterine growth restriction (IUGR), possibly intracranial calcifications, nonspecific enteropathy; Revesz syndrome: Bilateral exudative retinopathy, IUGR, intracranial calcification, cerebellar hypoplasia, psychomotor retardation; Coats plus: Bilateral exudative retinopathy, retinal telangiectasias, IUGR, intracranial calcifications, osteopenia with tendency to fracture with poor bone healing, gastrointestinal vascular ectasias.

**Supplemental Table 2: Study subjects with inferred genotype (n=24).** All individuals were Field Cohort participants. Genotype was inferred by mode of inheritance and reported clinical information (presence of very short telomeres, pulmonary fibrosis, bone marrow failure, and/or hematologic malignancies)

| Gene         | Number of inferred genotype carriers (number of obligate carriers) | Inferred inheritance pattern |
|--------------|--------------------------------------------------------------------|------------------------------|
| <i>DKC1</i>  | 5 (2)                                                              | XLR                          |
| <i>RTEL1</i> | 2 (0)                                                              | AD                           |
| <i>TERC</i>  | 9 (4)                                                              | AD                           |
| <i>TERT</i>  | 5 (1)                                                              | AD                           |
| <i>TINF2</i> | 3 (3)                                                              | AD                           |

**Supplemental Table 3: Definitions of clinical features used in this study. Data based on self-report (questionnaires), medical report, and/or clinical assessment at the NIH Clinical Center by the IBMFS study team**

| Assessed clinical feature | Evaluation details for review of phenotype features                                                                                                                                                                                                                                                                                                                                                                                                                                                          |
|---------------------------|--------------------------------------------------------------------------------------------------------------------------------------------------------------------------------------------------------------------------------------------------------------------------------------------------------------------------------------------------------------------------------------------------------------------------------------------------------------------------------------------------------------|
| Consanguinity             | Based on self-report and evaluation of family pedigree.                                                                                                                                                                                                                                                                                                                                                                                                                                                      |
| Prematurity               | Born < 37 gestational weeks.                                                                                                                                                                                                                                                                                                                                                                                                                                                                                 |
| Small for gestational age | <ul style="list-style-type: none"> <li>&lt; 37 gestational weeks: birthweight &lt; 10<sup>th</sup> percentile (<a href="http://www.cdc.gov">www.cdc.gov</a>)</li> <li>≥ 37 gestational weeks: birthweight &lt; 2500g</li> </ul>                                                                                                                                                                                                                                                                              |
| Short stature             | <p>Defined as height &lt; 3rd percentile for age</p> <ul style="list-style-type: none"> <li>&lt; 2 years of age: percentiles according to <a href="https://www.who.int/childgrowth/standards/height_for_age/en/">https://www.who.int/childgrowth/standards/height_for_age/en/</a></li> <li>2-19 years of age: percentiles according to <a href="https://www.cdc.gov/growthcharts/who_charts.htm">https://www.cdc.gov/growthcharts/who_charts.htm</a></li> </ul>                                              |
| Mucocutaneous triad       | <p>Lacy skin pigmentation, nail dysplasia, and oral leukoplakia:</p> <ul style="list-style-type: none"> <li>Non severe: 0-1 triad features</li> <li>Severe: 2-3 triad features</li> </ul>                                                                                                                                                                                                                                                                                                                    |
| Microcephaly              | <p>Head circumference &lt; 5<sup>th</sup> percentile for age:</p> <ul style="list-style-type: none"> <li>&lt; 2 years at time of measurement: Percentiles according to <a href="https://www.who.int/childgrowth/standards/height_for_age/en/">https://www.who.int/childgrowth/standards/height_for_age/en/</a></li> <li>≥ 2 years at time of measurement. Utilized webtool: <a href="https://simulconsult.com/resources/measurement.html">https://simulconsult.com/resources/measurement.html</a></li> </ul> |
| Cerebellar hypoplasia     | Diagnosis based on brain MRI reports.                                                                                                                                                                                                                                                                                                                                                                                                                                                                        |
| Development delay         | Evaluation according to physical exam at time of NIH visit (Clinic Cohort).                                                                                                                                                                                                                                                                                                                                                                                                                                  |
| Ataxia                    | Evaluation according to physical evaluation at time of NIH visit (Clinic Cohort).                                                                                                                                                                                                                                                                                                                                                                                                                            |
| Lacrimal duct stenosis    | According to ophthalmologic consult at time of NIH visit (Clinic Cohort).                                                                                                                                                                                                                                                                                                                                                                                                                                    |
| Epiphora                  | Self-report, medical reports or physical exam at time of NIH visit (Clinic Cohort).                                                                                                                                                                                                                                                                                                                                                                                                                          |
| Retinopathy               | According to ophthalmologic consultant at time of NIH visit (Clinic Cohort).                                                                                                                                                                                                                                                                                                                                                                                                                                 |
| Dental: Short roots       | Diagnosed by dental consultant at time of NIH visit (Clinic Cohort).                                                                                                                                                                                                                                                                                                                                                                                                                                         |

|                                                          |                                                                                                                                                                                                                                                                                                                                                                                                                                                                                    |
|----------------------------------------------------------|------------------------------------------------------------------------------------------------------------------------------------------------------------------------------------------------------------------------------------------------------------------------------------------------------------------------------------------------------------------------------------------------------------------------------------------------------------------------------------|
| <b>Hearing loss</b>                                      | Reported non-age-related hearing loss considered, if available corroborated by audiogram at time of NIH visit (Clinic Cohort).                                                                                                                                                                                                                                                                                                                                                     |
| <b>Congenital heart disease</b>                          | Positive history and/or abnormal echocardiogram at time of NIH visit (Clinic Cohort).                                                                                                                                                                                                                                                                                                                                                                                              |
| <b>Pulmonary fibrosis</b>                                | For individuals evaluated at NIH (Clinic Cohort) based on physical exam and diagnostics at time of NIH visit.<br><br>For follow-up period of Clinic Cohort patients and for additional individuals included in study (Field Cohort):<br>Family or self-report of established diagnosis of pulmonary fibrosis and/or (if available) medical records stating pulmonary fibrosis as the diagnosis.<br><br>A central review of pulmonary CT images was beyond the scope of this study. |
| <b>Pulmonary arteriovenous malformations (PAVM)</b>      | If reported as established diagnosis by self-report and/or medical reports (bubble contrast echocardiography, CT angiogram, cardiac catheterization, or lung perfusion scan).                                                                                                                                                                                                                                                                                                      |
| <b>Hepatopulmonary syndrome (HPS)</b>                    | If reported as established diagnosis by self-report and/or medical report based on positive bubble echocardiography and/or pulmonary scan with dilated pulmonary vessels in the context of severe liver disease with portal hypertension.                                                                                                                                                                                                                                          |
| <b>Severe liver disease</b>                              | Reported liver cirrhosis/ fibrosis diagnosed by biopsy, and/or portal hypertension diagnosed by ultrasound and/or esophageal varices diagnosed by endoscopy in the context of liver disease.                                                                                                                                                                                                                                                                                       |
| <b>Esophageal web/stricture</b>                          | Considered if established diagnosis by self-report, endoscopy, and/or other medical record report.                                                                                                                                                                                                                                                                                                                                                                                 |
| <b>Gastrointestinal telangiectasias</b>                  | Diagnosed abnormalities based on self-reported diagnosis by endoscopy, and/or by original endoscopy reports.                                                                                                                                                                                                                                                                                                                                                                       |
| <b>Gastrointestinal abnormalities</b>                    | Any reported gastrointestinal abnormality was collected based on self-report or medical report, only applicable for individuals evaluated at NIH visit (Clinic Cohort).                                                                                                                                                                                                                                                                                                            |
| <b>Kidney disease</b>                                    | Any reported structural renal abnormality based on self-report and/or medical report and/or ultrasound report at time of NIH visit (Clinic Cohort).                                                                                                                                                                                                                                                                                                                                |
| <b>Males: urethral stenosis, strictures, or phimosis</b> | Reported diagnosis at time of NIH visit and/or physical exam at NIH visit (Clinic Cohort).                                                                                                                                                                                                                                                                                                                                                                                         |
| <b>Males: undescended testis</b>                         | Reported diagnosis at time of NIH visit and/or physical exam at NIH visit (Clinic Cohort).                                                                                                                                                                                                                                                                                                                                                                                         |

|                                                                          |                                                                                                                                                                                                                                                                                                                                                                                                                                                                                                                                                                                                                                                                                                                                                                                                                                                                                                                                                       |
|--------------------------------------------------------------------------|-------------------------------------------------------------------------------------------------------------------------------------------------------------------------------------------------------------------------------------------------------------------------------------------------------------------------------------------------------------------------------------------------------------------------------------------------------------------------------------------------------------------------------------------------------------------------------------------------------------------------------------------------------------------------------------------------------------------------------------------------------------------------------------------------------------------------------------------------------------------------------------------------------------------------------------------------------|
| <b>Other genitourinary abnormalities</b><br>( <i>e.g.</i> , hypospadias) | Reported diagnosis at time of NIH visit and/or physical exam at NIH visit (Clinic Cohort).                                                                                                                                                                                                                                                                                                                                                                                                                                                                                                                                                                                                                                                                                                                                                                                                                                                            |
| <b>Infertility</b>                                                       | Any self-reported infertility issues at time of NIH visit (Clinic Cohort).                                                                                                                                                                                                                                                                                                                                                                                                                                                                                                                                                                                                                                                                                                                                                                                                                                                                            |
| <b>Any endocrine abnormality</b>                                         | Any endocrine abnormality reported at time of NIH visit (Clinic Cohort).<br>Abnormal lipid profiles were not specifically considered since we have shown in a previous study the association of androgens and changes in lipid profiles. <sup>2</sup><br><br>Low vitamin D levels were not separately considered.                                                                                                                                                                                                                                                                                                                                                                                                                                                                                                                                                                                                                                     |
| <b>Avascular osteonecrosis (AVN)</b>                                     | Established diagnosis according to MRI, reported either by questionnaire and/or medical reports.                                                                                                                                                                                                                                                                                                                                                                                                                                                                                                                                                                                                                                                                                                                                                                                                                                                      |
| <b>DEXA scan</b>                                                         | DEXA scans performed at the NIH (Clinic Cohort).                                                                                                                                                                                                                                                                                                                                                                                                                                                                                                                                                                                                                                                                                                                                                                                                                                                                                                      |
| <b>Dysmorphia</b>                                                        | Based on physical exam at time of NIH visit (Clinic Cohort). Self-reported dysmorphic features or features reported by medical reports were not considered.                                                                                                                                                                                                                                                                                                                                                                                                                                                                                                                                                                                                                                                                                                                                                                                           |
| <b>Immunologic abnormality</b>                                           | Decreased immunoglobulins and/or lymphocyte subsets according to laboratory diagnostics performed for patients evaluated at NIH visit (Clinic Cohort).<br><br>For evaluation all provided laboratory and patient history data was reviewed in detail.                                                                                                                                                                                                                                                                                                                                                                                                                                                                                                                                                                                                                                                                                                 |
| <b>Bone marrow failure (BMF)</b>                                         | <ul style="list-style-type: none"> <li>• Non-severe: ANC 500-&lt;1500/mm<sup>3</sup>, platelets 20.000-&lt;150.000/mm<sup>3</sup>, and/or Hb ≥8g/dl-less than normal for age</li> <li>• Severe: ANC &lt; 500/mm<sup>3</sup>, platelets &lt; 20.000/mm<sup>3</sup>, and/or Hb &lt; 8.0 g/dl</li> </ul> <p>BMF was always considered severe (irrespective of available laboratory data) if</p> <ul style="list-style-type: none"> <li>• Hematopoietic cell transplantation had been performed</li> <li>• Regular red cell or platelet transfusions were necessary</li> <li>• Androgen treatment had been initiated due to bone marrow failure</li> <li>• MDS or leukemia had been diagnosed</li> </ul> <p>Hemoglobin levels according to age were defined according to <a href="https://www.uptodate.com/contents/approach-to-the-child-with-anemia">https://www.uptodate.com/contents/approach-to-the-child-with-anemia</a> (accessed 06/30/2020).</p> |

|                                                                                                                                                                             |                                                                                                                                                                                                                                                                                                                                                                               |
|-----------------------------------------------------------------------------------------------------------------------------------------------------------------------------|-------------------------------------------------------------------------------------------------------------------------------------------------------------------------------------------------------------------------------------------------------------------------------------------------------------------------------------------------------------------------------|
| <b>Myelodysplastic syndrome</b>                                                                                                                                             | All reported diagnoses by self-report and/or medical report were considered. In all reported cases it was attempted to retrieve medical reports to corroborate the diagnosis. If available, diagnoses were verified according to the following criteria: Pathogenic abnormality by original cytogenetic report and/or morphological sign of MDS by original pathology report. |
| <b>Leukemia</b>                                                                                                                                                             | Reported leukemia or lymphoma by pathology report and/or medical report and/or self-report.                                                                                                                                                                                                                                                                                   |
| <b>Solid tumor</b>                                                                                                                                                          | Any reported solid tumor or carcinoma in situ, including lymphomas and melanomas, by pathology report and/or medical report and/or self-report.                                                                                                                                                                                                                               |
| <b>Non-melanoma skin cancer</b>                                                                                                                                             | Basal cell carcinoma (BCC) or squamous cell carcinoma (SCC) reported by pathology report and/or medical report and/or self-report. In all reported cases it was attempted to retrieve pathology reports to corroborate the diagnosis.                                                                                                                                         |
| NIH, National Institutes of Health; CT, Computer Tomography; MRI, Magnetic resonance imaging; ANC, absolute neutrophil count; Hb, hemoglobin; MDS, myelodysplastic syndrome |                                                                                                                                                                                                                                                                                                                                                                               |

#### **Supplemental Table 4: ACMG/AMP variant classification specifications**

Variants were classified using The American College of Medical Genetics and Genomics/The Association for Molecular Pathology guidelines (ACMG/AMP). The software VarSeq™ v2.2.0 (Bozeman, MT: Golden Helix, Inc., available from <http://www.goldenhelix.com>)<sup>3</sup> and Varsome<sup>4</sup> were used during the variant classification process. No ACMG/AMP criteria were applied for TERC (RNA component of the telomerase). *TERC* gene variant evaluation was based on critical regions of the TERC secondary structure, absence in gnomAD, disease segregation, the variant's presence in several unrelated individuals with a consistent phenotype, and previous publications.<sup>5</sup>

The following tables lists the ACMG/AMP criteria and the adjustments applied in the context of evaluating variants in TBD-associated genes for our study cohort. Special consideration was given to varying modes of inheritance in TBD associated genes (*TERT*, *ACD*, *RTEL1*, *PARN*).

| ACMG/AMP criteria | ACMG criteria summary                                                                                 | Comments on usage                                                                                                                                                                                                                                                                                                                                                                                                                                                                                                                                                                                                                                                                                                                                                                               | strength-level            |
|-------------------|-------------------------------------------------------------------------------------------------------|-------------------------------------------------------------------------------------------------------------------------------------------------------------------------------------------------------------------------------------------------------------------------------------------------------------------------------------------------------------------------------------------------------------------------------------------------------------------------------------------------------------------------------------------------------------------------------------------------------------------------------------------------------------------------------------------------------------------------------------------------------------------------------------------------|---------------------------|
| PVS1              | Null variant in a gene where LOF is a known mechanism of disease                                      | <p>Application based on SVI recommendations regarding predicted nonsense-mediated mRNA decay, presence in biologically relevant transcript, importance of the truncated protein domain, clinical significance of exons, identification of cryptic or newly generated splice sites.<sup>6</sup></p> <p>Clinical validity of gene-disease associations defined according to Strande et al. 2017.<sup>7</sup> All currently with DC associated genes meet evidence level of definite or strong.</p> <p>Strength-level adjusted based on SVI recommendations.<sup>6</sup><br/>For evaluation the publicly available tool AutoPVS1 (<a href="http://autopvs1.genetics.bgi.com/">http://autopvs1.genetics.bgi.com/</a>) was used.</p> <p>PVS1 ruled out PM4 to avoid double counting of evidence.</p> | Supporting to very strong |
| PS1               | Same amino acid change as a previously established pathogenic variant regardless of nucleotide change | <p>Variants with an entry in ClinVar as likely pathogenic/pathogenic if criteria were available by the submitter and could be reviewed.<sup>8,9</sup></p> <p>Evidence was based on the variants review status in ClinVar</p> <ul style="list-style-type: none"> <li>• <u>Supporting</u>: Criteria provided, single submitter or multiple submitters, conflicting interpretations</li> <li>• <u>Moderate</u>: Criteria provided, multiple submitters, no conflict</li> <li>• <u>Strong</u>: Reviewed by expert panel</li> <li>• <u>Very strong</u>: Practice guidelines</li> </ul>                                                                                                                                                                                                               | Supporting to very strong |
| PS2               | De novo (both maternity and paternity confirmed) in a patient                                         | PS2 was not applied in the context of our study evaluation, since maternity and paternity confirmation is not routinely available in the setting of an observational study. Instead PM6 was applied.                                                                                                                                                                                                                                                                                                                                                                                                                                                                                                                                                                                            | N/A                       |



|            |                                                                                                                           |                                                                                                                                                                                                                                                                                                                                                                                                                                                                                                                                                                                                                                                                                                                                                                                                                                                                                                                                                                                                                                    |                           |
|------------|---------------------------------------------------------------------------------------------------------------------------|------------------------------------------------------------------------------------------------------------------------------------------------------------------------------------------------------------------------------------------------------------------------------------------------------------------------------------------------------------------------------------------------------------------------------------------------------------------------------------------------------------------------------------------------------------------------------------------------------------------------------------------------------------------------------------------------------------------------------------------------------------------------------------------------------------------------------------------------------------------------------------------------------------------------------------------------------------------------------------------------------------------------------------|---------------------------|
|            | with the disease and no family history                                                                                    |                                                                                                                                                                                                                                                                                                                                                                                                                                                                                                                                                                                                                                                                                                                                                                                                                                                                                                                                                                                                                                    |                           |
| <b>PS3</b> | Well-established in vitro or in vivo functional studies supportive of a damaging effect on the gene or gene product       | <p>Telomere length assays were not accepted as sole functional study evidence since telomere length (leukocyte flow FISH or other testing) can vary by the specific gene. Short telomeres could be caused by deleterious variants in any of the TBD genes. Additionally, it has previously been shown, that the absence of very short telomeres (&lt;1st percentile) does not indicate the absence of a deleterious TBD gene variant– specifically in the context of AD disease. Therefore, only the combination of telomere length testing and other functional testing of a specific variant (for example telomerase activity measured by the fluorescent telomeric repeat-amplification protocol (TRAP) assay) justified the application of different strength levels of PS3.<sup>10</sup></p> <p>Evidence was based on the framework published in Brnich et al. 2019.<sup>10</sup> Since only published functional studies were taken into consideration, evidence levels applied were exclusively supporting to moderate.</p> | Supporting to very strong |
| <b>PS4</b> | The prevalence of the variant in affected individuals is significantly increased compared with the prevalence in controls | <p>Only applied for variants absent from gnomAD (meeting PM2), or described to be founder mutations in certain populations, but repeatedly described in unrelated probands with a phenotype consistent with TBD (pulmonary fibrosis, BMF, MDS or hematologic malignancies, with short/very short telomeres).</p> <p>Evidence level based on ClinGen’s RASopathy Expert Panel Consensus Methods for Variant Interpretation.<sup>11</sup></p> <ul style="list-style-type: none"> <li>• <u>Supporting</u>: 1-2 independent</li> <li>• <u>Moderate</u>: 3-4 independent occurrences</li> <li>• <u>Strong</u>: ≥5 independent occurrences</li> </ul>                                                                                                                                                                                                                                                                                                                                                                                    | Supporting to strong      |
| <b>PM1</b> | Located in a mutational hot spot and/or critical and well-established functional domain                                   | Applied only to missense/in-frame variants located within functional domains. LoF variants are generally deemed to damage the function of the entire protein, irrespective of their location. <sup>12</sup>                                                                                                                                                                                                                                                                                                                                                                                                                                                                                                                                                                                                                                                                                                                                                                                                                        | Supportive to Moderate    |

|            |                                                                      |                                                                                                                                                                                                                                                                                                                                                                                                                                                                                                                                                                                                                                                                                                                                                                                                                                                                                                                            |                        |
|------------|----------------------------------------------------------------------|----------------------------------------------------------------------------------------------------------------------------------------------------------------------------------------------------------------------------------------------------------------------------------------------------------------------------------------------------------------------------------------------------------------------------------------------------------------------------------------------------------------------------------------------------------------------------------------------------------------------------------------------------------------------------------------------------------------------------------------------------------------------------------------------------------------------------------------------------------------------------------------------------------------------------|------------------------|
|            | (e.g., active site of an enzyme) without benign variation            | <p>PM1 scoring was applied with the following criteria (based on Kopanos et al. 2019<sup>4</sup> and Ellard et al. 2020: ACGS Best Practice Guidelines for Variant Classification in Rare Disease 2020, accessible at <a href="https://www.acgs.uk.com/quality/best-practice-guidelines/">https://www.acgs.uk.com/quality/best-practice-guidelines/</a>).</p> <ul style="list-style-type: none"> <li>• <u>Supporting</u>: Functional protein domains based on UniProt (<a href="http://www.uniprot.org">www.uniprot.org</a>), was conserved, and no benign variants within 3 amino acid positions of the variant</li> <li>• <u>Moderate</u>: Hotspots as a region of 25 base-pairs on both sides of the evaluated variant, with at least 6 reported pathogenic variants within this region.</li> </ul>                                                                                                                     |                        |
| <b>PM2</b> | Absent from controls (or at extremely low frequency if recessive)    | <p>Population databanks considered: gnomAD exome (or genome if insufficient coverage) and 1000 Genomes.</p> <p>SVI recommendations have considered reducing the evidence of PM2 to supportive (<a href="https://clinicalgenome.org/working-groups/sequence-variant-interpretation/">https://clinicalgenome.org/working-groups/sequence-variant-interpretation/</a>). In the context of this study, we considered PM2 with moderate weight given the following adjustments (modified from criteria in Nykamp et al. 2017)<sup>13</sup>:</p> <ul style="list-style-type: none"> <li>• <u>Supportive evidence</u>: Applied only if present below the following MAF. For dominant and dominant/recessive inherited genes MAF&lt;0.1%. For recessive inherited genes MAF&lt;0.3%.</li> <li>• <u>Moderate</u>: If absent in population databanks or if &lt;8 alleles total in gnomAD exomes (both AD and AR disease).</li> </ul> | Supporting to Moderate |
| <b>PM3</b> | For recessive disorders, detected in trans with a pathogenic variant | <p>Based on the recommendations by: ClinGen. (<a href="https://clinicalgenome.org/site/assets/files/3717/svi_proposal_for_pm3_criteria_-_version_1.pdf">https://clinicalgenome.org/site/assets/files/3717/svi_proposal_for_pm3_criteria_-_version_1.pdf</a>) only applied in recessive disorders, if detected in trans with a pathogenic or likely pathogenic variant in an affected patient.</p>                                                                                                                                                                                                                                                                                                                                                                                                                                                                                                                          | Supporting to Moderate |

|            |                                                                                                                                   |                                                                                                                                                                                                                                                                                                                                                                                                                                                                                                                                                                      |                           |
|------------|-----------------------------------------------------------------------------------------------------------------------------------|----------------------------------------------------------------------------------------------------------------------------------------------------------------------------------------------------------------------------------------------------------------------------------------------------------------------------------------------------------------------------------------------------------------------------------------------------------------------------------------------------------------------------------------------------------------------|---------------------------|
|            |                                                                                                                                   | <p>Was applied for all recessive variants and for variants in <i>TERT</i>, <i>PARN</i>, <i>RTEL1</i>, and <i>ACD</i>, which occurred in AD and in AR disease.</p> <ul style="list-style-type: none"> <li>• <u>Supporting</u> evidence if homozygous occurrence</li> <li>• <u>Moderate</u> evidence if in trans to a pathogenic/likely pathogenic variant</li> </ul>                                                                                                                                                                                                  |                           |
| <b>PM4</b> | Protein length changes as a result of in-frame deletions/insertions in a non-repeat region or stop-loss variants                  | Was not applied if PVS1 was used. <sup>6</sup>                                                                                                                                                                                                                                                                                                                                                                                                                                                                                                                       | Moderate                  |
| <b>PM5</b> | Novel missense change at an amino acid residue where a different missense change determined to be pathogenic has been seen before | <p>Variants with an entry in ClinVar as likely pathogenic/pathogenic if criteria were available by the submitter and could be reviewed.<sup>8,9</sup></p> <p>Evidence was based on review status in ClinVar</p> <ul style="list-style-type: none"> <li>• <u>Supporting</u>: Criteria provided, single submitter or multiple submitters, conflicting interpretations</li> <li>• <u>Moderate</u>: Criteria provided, multiple submitters, no conflict</li> <li>• <u>Strong</u>: Reviewed by expert panel</li> <li>• <u>Very strong</u>: Practice guidelines</li> </ul> | Supporting to very strong |
| <b>PM6</b> | Assumed de novo, but without confirmation of paternity and maternity                                                              | <p>Applied in cases in which variant was identified in the index case and genotype data of the parents could be obtained.</p> <p>Only supporting evidence applied, since the TBD phenotype is consistent with gene but not highly specific (since other TBD associated genes also potentially cause similar disease).</p> <p>Based on the recommendations by: ClinGen. ClinGen sequence variant interpretation recommendation for de novo criteria (PS2/PM6) version 1.0, 2018. Available at</p>                                                                     | Supporting                |

|            |                                                                                                                                                       |                                                                                                                                                                                                                                                                                                                                                                                                                                                                                                                                                                                                                                                                                                                                     |                      |
|------------|-------------------------------------------------------------------------------------------------------------------------------------------------------|-------------------------------------------------------------------------------------------------------------------------------------------------------------------------------------------------------------------------------------------------------------------------------------------------------------------------------------------------------------------------------------------------------------------------------------------------------------------------------------------------------------------------------------------------------------------------------------------------------------------------------------------------------------------------------------------------------------------------------------|----------------------|
|            |                                                                                                                                                       | <a href="https://clinicalgenome.org/site/assets/files/3461/svi_proposal_for_de_novo_crit_eria_v1_0.pdf">https://clinicalgenome.org/site/assets/files/3461/svi_proposal_for_de_novo_crit_eria_v1_0.pdf</a>                                                                                                                                                                                                                                                                                                                                                                                                                                                                                                                           |                      |
| <b>PP1</b> | Cosegregation with disease in multiple affected family members in a gene definitively known to cause the disease                                      | <p>Applied genotype-positive individuals (or obligate carriers) within one or across multiple families with the following strength levels (modified from Nykamp et al. 2017).<sup>13</sup></p> <p>A positive phenotype was considered as the presence of pulmonary fibrosis, moderate to severe BMF, liver disease, triad features with short telomeres.<sup>5,14</sup></p> <p><u>Supportive</u>: Minimum of 3 individuals with dominant or 2 individuals with 2 rare variants in trans and affected with a recessive condition</p> <p><u>Moderate</u>: Six dominant or 3 recessive affected individuals from at least 2 families</p> <p><u>Strong</u>: 10 dominant or 5 recessive affected individuals from 2 or more families</p> | Supporting to strong |
| <b>PP2</b> | Missense variant in a gene that has a low rate of benign missense variation and in which missense variants are a common mechanism of disease          | <p>Only applied in genes with a missense constraint score (gnomAD) <math>\geq 3.09</math>.<sup>15</sup></p> <p>For the evaluated genes within this study, this was only true for <i>TERT</i> and <i>DKC1</i>.</p>                                                                                                                                                                                                                                                                                                                                                                                                                                                                                                                   | Supporting           |
| <b>PP3</b> | Multiple lines of computational evidence support a deleterious effect on the gene or gene product (conservation, evolutionary, splicing impact, etc.) | <p>Applied for missense variants</p> <p>REVEL, MetaSVM and BayesDel (applied score BayesDel_noAF) were used as in silico prediction tools.<sup>16-18</sup></p> <p>The binary threshold applied for REVEL was set at 0.5 (with &gt;0.5 for deleterious).</p> <p>If at least 2 of the in silico tools agreed as being deleterious, PP3 was applied. Only supportive evidence was applied since there is currently not a consensus-based approach for the application of in silico prediction tools.<sup>16</sup></p>                                                                                                                                                                                                                  | Supporting           |
| <b>PP4</b> | Patient's phenotype or family history is highly specific for a                                                                                        | For the Inherited Bone Marrow Failure Syndrome study at the National Cancer Institute, each participant is enrolled based on clinical, family history and                                                                                                                                                                                                                                                                                                                                                                                                                                                                                                                                                                           | Supporting           |

|            |                                                                                                                                                                                |                                                                                                                                                                                                                                                                                                                                          |                      |
|------------|--------------------------------------------------------------------------------------------------------------------------------------------------------------------------------|------------------------------------------------------------------------------------------------------------------------------------------------------------------------------------------------------------------------------------------------------------------------------------------------------------------------------------------|----------------------|
|            | disease with a single genetic etiology                                                                                                                                         | diagnostic findings. For the current study, all study subjects were participating in the same study. In this context, PP4 was therefore scored as supporting evidence.                                                                                                                                                                   |                      |
| <b>PP5</b> | Reputable source recently reports variant as pathogenic, but the evidence is not available to the laboratory to perform an independent evaluation                              | According to the recent SVI recommendations PP5/BP6 should not be applied. <sup>19</sup>                                                                                                                                                                                                                                                 | N/A                  |
| <b>BS2</b> | Observed in a healthy adult individual for a recessive (homozygous), dominant (heterozygous), or X-linked (hemizygous) disorder, with full penetrance expected at an early age | Not applicable in the context of the current evaluation. TBD associated variants have been described previously to have incomplete penetrance. <sup>20</sup>                                                                                                                                                                             | N/A                  |
| <b>BS3</b> | Well-established in vitro or in vivo functional studies show no damaging effect on protein function or splicing                                                                | See PS3                                                                                                                                                                                                                                                                                                                                  | Supporting to strong |
| <b>BS4</b> | Lack of segregation in affected members of a family                                                                                                                            | Since the presented study cohort of a pre-selected group of probands clinically determined to be TBD affected, BS4 was not applied. PP1 was considered. Additional information for scoring of segregation see PP1.                                                                                                                       | N/A                  |
| <b>BP1</b> | Missense variant in a gene for which primarily truncating variants are known to cause disease                                                                                  | Was not applied since despite a missense constraint score (gnomAD) $\leq 3.09$ in <i>ACD</i> , <i>RTEL1</i> , <i>CTC1</i> , <i>WRAP53</i> , <i>TINF2</i> and <i>PARN</i> , all the mentioned genes do not have only truncating variants as cause of disease. In all genes, missense variants have also been reported as disease causing. | Supporting           |
| <b>BP2</b> | Observed in trans with a pathogenic variant for a fully                                                                                                                        | See PM3                                                                                                                                                                                                                                                                                                                                  | N/A                  |

|            |                                                                                                                                                                                                            |                                                                                                                                                                                                                                          |            |
|------------|------------------------------------------------------------------------------------------------------------------------------------------------------------------------------------------------------------|------------------------------------------------------------------------------------------------------------------------------------------------------------------------------------------------------------------------------------------|------------|
|            | penetrant dominant gene/disorder or observed in cis with a pathogenic variant in any inheritance pattern                                                                                                   |                                                                                                                                                                                                                                          |            |
| <b>BP4</b> | Multiple lines of computational evidence suggest no impact on gene or gene product (conservation, evolutionary, splicing impact, etc.)                                                                     | Applied for missense variants.<br><br>True if 3 selected in silico prediction scores (BayesDel_noAF, REVEL, and MetaSVM) predicted variant to be tolerated (REVEL <0.5), or if 2 predicted tolerated and the position was not conserved. | Supporting |
| <b>BP5</b> | Variant found in a case with an alternate molecular basis for disease                                                                                                                                      | Individuals with an identified possible alternate molecular base for disease (or a gene not considered a TBD associated gene as of May 2019) were excluded from this study.                                                              | N/A        |
| <b>BP7</b> | A synonymous (silent) variant for which splicing prediction algorithms predict no impact to the splice consensus sequence nor the creation of a new splice site AND the nucleotide is not highly conserved | Carriers of synonymous variants in TBD-associated genes were not considered in the context of the here presented study.                                                                                                                  | N/A        |

**Supplemental Table 5: variants in telomere biology disorder-associated genes in study participants and variant curation using adapted ACMG/AMP criteria**

| Gene                     | Zygoty            | cDNA change    | AA change   | functional classification | ACMG classification                                       | Applied ACMG/AMP criteria                                                         | # of affected families in this cohort |
|--------------------------|-------------------|----------------|-------------|---------------------------|-----------------------------------------------------------|-----------------------------------------------------------------------------------|---------------------------------------|
| <i>ACD</i>               | Comp<br>Het       | c.1213C>A      | p.P405T     | missense                  | VUS-P<br>(evidence for modifier<br>in functional studies) | PM2_Supporting PM3 PP4<br>BP4_Supporting                                          | 1                                     |
| <i>ACD</i> <sup>§</sup>  | Comp.<br>Het, Het | c.250_252del   | p.K84del    | Inframe deletion          | LP                                                        | PS3 PS4_Supporting PM2 PM4 PP4                                                    | 1                                     |
| <i>CTC1</i> <sup>#</sup> | Comp.<br>Het      | c.2959C>T      | p.R987W     | missense                  | LP                                                        | PS3_Supporting PS1_Supporting<br>PM2_Supporting PM3 PP1 PP3 PP4                   | 1                                     |
| <i>CTC1</i> <sup>#</sup> | Comp.<br>Het      | c.1270T>G      | p.C424G     | missense                  | LP                                                        | PM2_Supporting PM3 PP1 PP3 PP4                                                    | 1                                     |
| <i>CTC1</i>              | Comp.<br>Het      | c.2954_2956del | p.C985del   | Inframe deletion          | LP                                                        | PS3_Supporting PM2 PM3 PM4<br>PP4                                                 | 4                                     |
| <i>CTC1</i>              | Comp.<br>Het      | c.1186C>T      | p.R396*     | stop gained               | P                                                         | PVS1 PM2 PP4                                                                      | 1                                     |
| <i>CTC1</i>              | Comp.<br>Het      | c.724_727del   | p.K242Lfs*? | frameshift                | P                                                         | PVS1 PS3_Supporting<br>PM2_Supporting PM3 PP1 PP4                                 | 3                                     |
| <i>DKC1</i>              | Hemiz             | c.103_105del   | p.E35del    | Inframe deletion          | LP                                                        | PM1 PM2 PM4 PP4                                                                   | 1                                     |
| <i>DKC1</i>              | Hemiz             | c.1058C>T      | p.A353V     | missense                  | LP                                                        | PS1_Supporting PS3_Moderate<br>PS4_Moderate PM1 PP2 PP3 PP4                       | 4                                     |
| <i>DKC1</i>              | Hemiz             | c.109_111del   | p.Leu37del  | Inframe deletion          | LP                                                        | PS3_Supporting PS4_Supporting<br>PM1 PM2 PM4 PP2 PP3 PP4                          | 1                                     |
| <i>DKC1</i>              | Hemiz             | c.1168A>C      | p. K390Q    | missense                  | LP                                                        | PS3_Supporting PM2 PP2 PP3 PP4                                                    | 1                                     |
| <i>DKC1</i>              | Hemiz             | c.1178T>A      | p.I393N     | missense                  | LP                                                        | PM1_Supporting PM2 PP2 PP3 PP4                                                    | 1                                     |
| <i>DKC1</i>              | Hemiz             | c.1223C>T      | p.T408I     | missense                  | LP                                                        | PS4_Supporting PM2 PP2 PP3 PP4                                                    | 1                                     |
| <i>DKC1</i>              | Hemiz             | c.1345C>G      | p.R449G     | missense                  | LP                                                        | PS1_Supporting PM2 PP2 PP3 PP4                                                    | 1                                     |
| <i>DKC1</i>              | Hemiz             | c.146C>T       | p.T49M      | missense                  | P                                                         | PS1_Moderate PS3_Supporting<br>PS4_Moderate PM1 PM2<br>PM6_Supporting PP2 PP3 PP4 | 1                                     |
| <i>DKC1</i>              | Hemiz             | c.160C>G       | p.L54V      | missense                  | LP                                                        | PS3_Supporting PS4_Supporting<br>PM2 PM1 PP1 PP2 PP3 PP4                          | 2                                     |
| <i>DKC1</i>              | Hemiz             | c.191T>G       | p.V64G      | missense                  | LP                                                        | PM1 PM2 PP2 PP3 PP4                                                               | 1                                     |

|                           |                |           |              |                                                                               |                                                                                          |                                                       |   |
|---------------------------|----------------|-----------|--------------|-------------------------------------------------------------------------------|------------------------------------------------------------------------------------------|-------------------------------------------------------|---|
| <b>DKC1</b>               | Hemiz          | c.196A>G  | p.T66A       | missense                                                                      | LP                                                                                       | PS3_Supporting PM1 PM2 PP2 PP3 PP4                    | 1 |
| <b>DKC1</b>               | Hemiz          | c.209C>T  | p.T70I       | missense                                                                      | LP                                                                                       | PS3_Supporting PM1 PM2 PP2 PP3 PP4                    | 1 |
| <b>DKC1</b>               | Hemiz          | c.277A>T  | p.N93Y       | missense                                                                      | VUS-P (has evidence for pathogenicity but does not completely fulfill ACMG/AMP criteria) | PM2 PP2 PP3 PP4                                       | 1 |
| <b>DKC1</b>               | Hemiz          | c.5C>T    | p.A2V        | missense                                                                      | LP                                                                                       | PS4_Moderate PM1 PM2 PP2 PP3 PP4                      | 1 |
| <b>DKC1</b>               | Hemiz          | c.941A>G  | p. K314R     | missense                                                                      | LP                                                                                       | PS3_Supporting PS4_Supporting PM1 PM2 PP1 PP2 PP3 PP4 | 1 |
| <b>DKC1</b>               | Hemiz          | c.949C>T  | p. L317F     | missense                                                                      | LP                                                                                       | PS4_Moderate PM1 PM2 PP2 PP3 PP4                      | 1 |
| <b>DKC1</b>               | Hemiz          | c.965G>A  | R322Q        | missense                                                                      | LP                                                                                       | PS4_Supporting PM1 PM2 PP1 PP2 PP3 PP4                | 1 |
| <b>PARN#<sup>5</sup></b>  | Comp. Het, Het | c.260C>T  | p.S87L       | missense                                                                      | LP                                                                                       | PS3_Supporting PM1 PM2 PP4                            | 1 |
| <b>PARN#<sup>5</sup></b>  | Comp. Het, Het | c.19A>C   | p.N7H        | missense                                                                      | LP                                                                                       | PS3_Supporting PS4_Supporting PM2 PM3_Supporting PP4  | 1 |
| <b>PARN</b>               | Comp. Het      | c.-63C>T  | -            | 5 prime UTR                                                                   | VUS-P (deemed to contribute to disease when compound heterozygote state)                 | PM2 PM3 PP4                                           | 1 |
| <b>PARN<sup>5</sup></b>   | Comp. Het      | c.709C>T  | p.R237*      | stop gained                                                                   | P                                                                                        | PVS1 PS4_Moderate PM2 PP4                             | 1 |
| <b>PARN#<sup>5</sup></b>  | Comp. Het, Het |           |              | deletion encompassing PARN locus per SNP array: chr16:14,037,911 - 15,319,123 | NA                                                                                       |                                                       | 1 |
| <b>PARN#</b>              | Comp. Het, Het |           |              | noncoding defect affecting accumulation of PARN                               | NA                                                                                       |                                                       | 1 |
| <b>RTEL1#<sup>5</sup></b> | Comp. Het, Het | c.1675T>A | p.F559I      | missense                                                                      | LP                                                                                       | PS4_Supporting PM1_Supporting PM2 PM3 PP3 PP4         | 1 |
| <b>RTEL1</b>              | Het            | c.3506C>A | p.S1169*     | stop gained                                                                   | LP                                                                                       | PVS1 PM2 PP4                                          | 1 |
| <b>RTEL1<sup>5</sup></b>  | Comp. Het, Het | c.3289del | p.A1097Lfs*6 | frameshift                                                                    | P                                                                                        | PVS1 PM2 PM3 PP1 PP4                                  | 1 |
| <b>RTEL1</b>              | Het            | c.1861G>A | p.A621T      | missense                                                                      | LP                                                                                       | PM1_Supporting PM2 PP1 PP3 PP4                        | 1 |



|                           |                              |                        |               |               |    |                                                                                                                |                            |   |
|---------------------------|------------------------------|------------------------|---------------|---------------|----|----------------------------------------------------------------------------------------------------------------|----------------------------|---|
| <b>RTEL1<sup>§</sup></b>  | Comp.<br>Het, Het            | c.1773G>T              | p.E591D       | missense      | LP | PM1_Supporting PM2 PM3 PP3<br>PP4                                                                              | 1                          |   |
| <b>RTEL1<sup>§</sup></b>  | Comp.<br>Het, Het            | c.3370del              | p.H1124Tfs*12 | frameshift    | P  | PVS1 PS1_Supporting PM2 PM3<br>PP1 PP4                                                                         | 1                          |   |
| <b>RTEL1</b>              | Comp.<br>Het                 | c.1274T>C              | p.I425T       | missense      | LP | PS4_Supporting PM2 PM3 PP3 PP4                                                                                 | 1                          |   |
| <b>RTEL1<sup>#§</sup></b> | Comp.<br>Het, Het            | c.1476G>T              | p.M492I       | missense      | LP | PS1_Moderate PS3_Moderate<br>PS4_Moderate PM2_Supporting<br>PP1 PP3 PP4                                        | 2                          |   |
| <b>RTEL1<sup>§</sup></b>  | Comp.<br>Het, Het            | c.49C>T                | p.P17S        | missense      | LP | PS1_Supporting PM1_Supporting<br>PM2 PM3 PP1 PP3 PP4                                                           | 1                          |   |
| <b>RTEL1<sup>§</sup></b>  | Comp.<br>Het, Het            | c.3445del              | p.Q1149Rfs*?  | frameshift    | LP | PVS1_Strong PM2 PM3 PP1 PP4                                                                                    | 1                          |   |
| <b>RTEL1<sup>§</sup></b>  | Comp.<br>Het,<br>Hom,<br>Het | c.3791G>A              | p.R1264H      | missense      | LP | PS1_Moderate PS3_Moderate<br>PS4_Supporting PM2_Supporting<br>PM3 PP1 PP4                                      | 2                          |   |
| <b>RTEL1</b>              | Comp.<br>Het                 | c.2920C>T              | p.R974*       | stop gained   | P  | PVS1 PS3_Moderate<br>PS4_Moderate PM2_Supporting<br>PM3 PP1_Moderate PP4                                       | 2                          |   |
| <b>RTEL1</b>              | Het                          | c.2956C>T              | p.R986*       | stop gained   | P  | PVS1 PM2_Supporting PP1 PP4                                                                                    | 3                          |   |
| <b>RTEL1<sup>#§</sup></b> | Comp.<br>Het, Het            | c.137C>T               | p.T46I        | missense      | LP | PM1_Supporting PM2 PM3 PP3<br>PP4                                                                              | 1                          |   |
| <b>RTEL1<sup>§</sup></b>  | Comp.<br>Het, Het            | c.1266+3A>G            | -             | splice region | LP | PM2 PP4 PP1 PM3                                                                                                | 1                          |   |
| <b>RTEL1</b>              | Hom                          | c.2025+4A>C            | -             | splice region |    | VUS-P (evidence of<br>pathogenicity, however<br>lacking family data, so<br>ACMG/AMP criteria<br>not fulfilled) | PM2 PM3_Supporting PP3 PP4 | 1 |
| <b>RTEL1<sup>§</sup></b>  | Hom,<br>Het                  | c.2142-7C>G            | -             | splice region | LP | PS3_Moderate PM2<br>PM3_Supporting PP4                                                                         | 1                          |   |
| <b>TERC</b>               | Het                          | n.97_98del             | -             | TERC          | P  |                                                                                                                | 1                          |   |
| <b>TERC</b>               | Het                          | n.100T>A               | -             | TERC          | P  |                                                                                                                | 1                          |   |
| <b>TERC</b>               | Het                          | n.56_62del             | -             | TERC          | P  |                                                                                                                | 1                          |   |
| <b>TERC</b>               | Het                          | n.334_339dupGG<br>GGCG | -             | TERC          | LP |                                                                                                                | 1                          |   |
| <b>TERC</b>               | Het                          | n.114_115del           | -             | TERC          | P  |                                                                                                                | 1                          |   |
| <b>TERC</b>               | Het                          | n.413_417del           | -             | TERC          | LP |                                                                                                                | 1                          |   |

|                         |                |              |                |                                           |    |                                                                                          |                            |   |
|-------------------------|----------------|--------------|----------------|-------------------------------------------|----|------------------------------------------------------------------------------------------|----------------------------|---|
| <b>TERC</b>             | Het            | n.381G>A     | -              | TERC                                      | P  |                                                                                          | 1                          |   |
| <b>TERC#</b>            | Het            | n.56_58del   | -              | TERC                                      | P  |                                                                                          | 1                          |   |
| <b>TERC</b>             | Het            | n.357_365del | -              | TERC                                      | LP |                                                                                          | 1                          |   |
| <b>TERT</b>             | Het            | c.416T>G     | p.L139R        | missense                                  | LP | PS4_Supporting PM1 PM2 PP2 PP3 PP4                                                       | 1                          |   |
| <b>TERT</b>             | Comp. Het      | c.2455C>T    | p.R819C        | missense                                  | LP | PS1_Supporting PS4_Supporting PM2 PM1 PP2 PP4                                            | 1                          |   |
| <b>TERT<sup>s</sup></b> | Comp. Het, Het | c.1990G>A    | p.V664M        | missense                                  | LP | PM1 PM2 PM3 PM5_Supporting PP2 PP4                                                       | 1                          |   |
| <b>TERT</b>             | Het            | c.2935C>T    | p. R979W       | missense                                  | LP | PS3_Supporting PS4_Moderate PM1 PM2 PP2 PP3 PP4 PP1                                      | 2                          |   |
| <b>TERT</b>             | Het            | c.2947C>T    | p.H983Y        | missense                                  | LP | PS4_Moderate PM1 PM2 PP2 PP4                                                             | 1                          |   |
| <b>TERT#</b>            | Het            | c.3257G>A    | p.R1086H       | missense                                  |    | VUS-P (has evidence for pathogenicity but does not completely fulfill ACMG/AMP criteria) | PM1 PM2_Supporting PP2 PP4 | 1 |
| <b>TERT#</b>            | Het            | c.2318T>C    | p.M773T        | missense                                  | LP | PS4_Supporting PM1 PM2 PP2 PP3 PP4                                                       | 1                          |   |
| <b>TERT</b>             | Het            | c.2575C>T    | p.R859W        | missense                                  | LP | PM1 PM2 PP2 PP4 BP4                                                                      | 1                          |   |
| <b>TERT</b>             | Het            | c.2593C>T    | p.R865C        | missense                                  | LP | PM1 PM2 PP2 PP3 PP4                                                                      | 1                          |   |
| <b>TERT</b>             | Het            | c.2110C>T    | p. P704S       | missense                                  | LP | PS3_Moderate PS4_Moderate PM1 PM2 PP2 PP3 PS3 PP4                                        | 3                          |   |
| <b>TERT<sup>s</sup></b> | Hom, Het       | c.3150G>C    | p.K1050N       | missense                                  | LP | PS4_Moderate PM3_Supporting PP1 PP2 PP3 PP4                                              | 1                          |   |
| <b>TERT</b>             | Het            | c.2768C>T    | p.P923L        | missense                                  | LP | PS4_Moderate PM1 PM2 PP1 PP2 PP3 PP4                                                     | 1                          |   |
| <b>TERT</b>             | Het            | c.3205G>A    | p.A1069T       | missense                                  | LP | PS4_Supporting PM1 PM2 PP1 PP2 PP3 PP4                                                   | 2                          |   |
| <b>TERT</b>             | Het            | c.2591T>C    | p.L864P        | missense                                  | LP | PM2 PM1 PP1 PP2 PP3 PP4                                                                  | 1                          |   |
| <b>TERT</b>             | Het            | c.2603A>G    | p.D868G        | missense                                  | LP | PM2 PM1 PP2 PP3 PS1_Supporting PP4 PP1                                                   | 1                          |   |
| <b>TERT</b>             | Het            | c.2240del    | p.V747Afs*20   | frameshift                                | P  | PVS1 PS4_Supporting PM2 PP1 PP4                                                          | 1                          |   |
| <b>TERT</b>             | Het            | c.320_328del | p.A107_G109del | Inframe deletion                          | LP | PM1 PM2 PM4 PP1 PP4                                                                      | 1                          |   |
| <b>TERT#</b>            | Het            |              |                | 1.4 Mb deletion at 5p15.33 including TERT | NA |                                                                                          | 1                          |   |

|               |              |              |             |             |    |                                                                      |   |
|---------------|--------------|--------------|-------------|-------------|----|----------------------------------------------------------------------|---|
| <b>TERT</b>   | Het          | c.258G>C     | p.Q86H      | missense    | LP | PM1 PM2 PP2 PP3 PP4                                                  | 1 |
| <b>TINF2</b>  | Het          | c.838A>G     | p. K280E    | missense    | LP | PS3_Supporting PM1 PM2 PP1 PP3 PP4                                   | 1 |
| <b>TINF2</b>  | Het          | c.845G>A     | p. R282H    | missense    | P  | PS1_Moderate PS3_Moderate PS4 PM1 PM2 PM5 PM6_Supporting PP1 PP3 PP4 | 5 |
| <b>TINF2</b>  | Het          | c.844C>A     | p. R282S    | missense    | P  | PS4 PM1 PM2 PM5 PM6_Supporting PP1 PP3 PP4                           | 1 |
| <b>TINF2</b>  | Het          | c.873G>C     | p. R291S    | missense    | LP | PM1 PM2 PP1 PP3 PP4                                                  | 1 |
| <b>TINF2</b>  | Het          | c.830del     | p.G277Efs*? | frameshift  | P  | PVS1 PM2 PP4                                                         | 1 |
| <b>TINF2</b>  | Het          | c.860T>C     | p.L287P     | missense    | LP | PS4_Supporting PM1 PM2 PP3 PP4                                       | 1 |
| <b>TINF2</b>  | Het          | c.847C>T     | p.P283S     | missense    | LP | PS1_Supporting PS4_Moderate PM1 PM2 PP2 PP3 PP4                      | 1 |
| <b>TINF2</b>  | Het          | c.851_852del | p.T284Sfs*7 | frameshift  | P  | PVS1 PM1 PM2 PM6 PP4                                                 | 1 |
| <b>TINF2</b>  | Het          | c.815G>A     | p.W272*     | stop gained | P  | PVS1 PM2 PM6_Supporting PP4                                          | 1 |
| <b>WRAP53</b> | Comp.<br>Het | c.1126C>T    | p.H376Y     | missense    | LP | PS3_Moderate PM2 PM3 PP4                                             | 1 |
| <b>WRAP53</b> | Comp.<br>Het | c.492C>A     | p.F164L     | missense    | LP | PS1_Supporting PS3_Moderate PM2 PM3 PP4 BP4_Supporting               | 1 |
| <b>WRAP53</b> | Comp.<br>Het | c.1303G>A    | p.G435R     | missense    | LP | PS3_Moderate PM2 PM3 PP3 PP4                                         | 1 |
| <b>WRAP53</b> | Comp.<br>Het | c.1192C>T    | p.R398W     | missense    | LP | PS3_Moderate PM2 PM3 PP3 PP4                                         | 1 |
| <b>WRAP53</b> | Comp.<br>Het | c.1135G>A    | p.G379S     | missense    | LP | PM2 PM3 PP3 PP4                                                      | 1 |
| <b>WRAP53</b> | Comp.<br>Het | c.438G>A     | p.W146*     | stop gained | LP | PVS1 PM2 PP4                                                         | 1 |

Genome reference consortium human build 37. RefSeq Transcript ID for each gene: *ACD*: NM\_001082486.2, *CTC1*: NM\_025099.6, *DKC1*: NM\_001363.5, *PARN*: NM\_002582.4, *RTEL1*: NM\_001283009.1 (XM\_005260207.1), *TERC*: NR\_001566.1, *TERT*: NM\_198253.3, *TINF2*: NM\_001099274.3, *WRAP53*: NM\_001143992.2

§ variants identified in family members of index cases with AR inheritance.

# No original report available, documentation based on research report.

Abbreviations: comp. het, compound heterozygous; hom, homozygous; het, heterozygous.

**Supplemental Table 6: Characteristics of participants divided by gene and inheritance pattern.**

|                                                            | AD- <i>RTEL1</i>             | AD- <i>TERT</i>              | AD- <i>TERC</i>               | AD- <i>PARN/ACD</i> | AD- <i>TINF2</i>     | AR- <i>RTEL1</i>            | AR-others<br>( <i>TERT, PARN, WRAP53, ACD</i> ) | <i>DKC1</i>              |
|------------------------------------------------------------|------------------------------|------------------------------|-------------------------------|---------------------|----------------------|-----------------------------|-------------------------------------------------|--------------------------|
| # of patients                                              | 29                           | 47                           | 30                            | 6                   | 25                   | 15                          | 16                                              | 32                       |
| Male:Female                                                | 12:17                        | 25:22                        | 13:17                         | 2:4                 | 16:9                 | 8:7                         | 13:3                                            | 32:0                     |
| Median age at diagnosis,<br>range (# of excluded patients) | 35.52,<br>1.32-<br>63.75 (2) | 34.72,<br>0.74-<br>69.44 (6) | 31.87,<br>11.84-<br>58.81 (8) | 50.2,<br>9.41-58.48 | 8.08,<br>0-71.58 (1) | 5.08,<br>0.78-<br>16.93 (4) | 15.51,<br>2.59-29.76 (0)                        | 9.99,<br>0-45.89<br>(3)  |
| Median age at last follow-up,<br>range                     | 37.68,<br>2.4-66.5           | 43.12,<br>2.68-<br>81.56     | 43.5,<br>18.6-82.17           | 49,<br>14.61-59.30  | 19.26,<br>4.63-79.58 | 16.2,<br>2.16-<br>26.33     | 25.4, 13.42-<br>33.93                           | 27.95,<br>1.36-<br>54.18 |
| Total number of patients with<br>TL assays available       | 24                           | 36                           | 19                            | 6                   | 19                   | 8                           | 14                                              | 20                       |
| • Stratified by inheritance<br>pattern                     | 85                           |                              |                               | 19                  |                      | 42                          |                                                 |                          |
| TL percentile <1 (% of<br>patients with TL available)      | 7 (29)                       | 24 (67)                      | 17 (89)                       | 2 (33)              | 18 (95)              | 8 (100)                     | 12 (86)                                         | 20 (100)                 |
| • Stratified by inheritance<br>pattern                     | 50                           |                              |                               | 18                  |                      | 40                          |                                                 |                          |
| TL percentile ≥1 (% of<br>patients with TL available)      | 17 (71)                      | 12 (33)                      | 2 (11)                        | 4 (67)              | 1 (5)                | 0                           | 2 (14)                                          | 0                        |

AD, autosomal dominant; AR, autosomal recessive; TL, telomere length measured by flow cytometry with *in situ* hybridization in lymphocytes.

**Supplemental Table 7. Clinical complications divided by gene and inheritance pattern.**

|                                              | <i>AD-RTEL1</i>                                  | <i>AD-TERT</i>                                                | <i>AD-TERC</i>                                                                      | <i>AD-PARN/ACD</i> | <i>AD-TINF2</i>                                                                                  | <i>AR-RTEL1</i>                                                 | <i>AR-others</i>                                                               | <i>DKC1</i>                                                                   |
|----------------------------------------------|--------------------------------------------------|---------------------------------------------------------------|-------------------------------------------------------------------------------------|--------------------|--------------------------------------------------------------------------------------------------|-----------------------------------------------------------------|--------------------------------------------------------------------------------|-------------------------------------------------------------------------------|
| <b># of patients</b>                         | 29                                               | 47                                                            | 30                                                                                  | 6                  | 25                                                                                               | 15                                                              | 16                                                                             | 32                                                                            |
| <b>Deceased [%]</b>                          | 5 [17.2]                                         | 12 [25.5]                                                     | 14 [46.7]                                                                           | 0                  | 14 [56]                                                                                          | 7 [46.7]                                                        | 8 [50]                                                                         | 23 [71.9]                                                                     |
| <b>Age at death in years median, range</b>   | 23.9, 2.4-66.5                                   | 64.2, 28.81-81.56                                             | 52.5, 24.67-82.17                                                                   | NA                 | 16.4, 4.63-79.58                                                                                 | 7.6, 2.16-25.13                                                 | 27.2, 13.79-33.93                                                              | 28.2, 1.36-54.18                                                              |
| <b>Median overall survival, 95% CI</b>       | 66.5, 52.37-NA                                   | 66.6, 57.34-79.47                                             | 54.5, 44.45-63.23                                                                   | NA                 | 37.9, 13.49-47.31                                                                                | 22.9, 4.34-NA                                                   | 33.2, 16.13-NA                                                                 | 36.6, 20.49-44.48                                                             |
| <b>Causes of death</b>                       | Cancer (1), pulmonary (2), treatment related (2) | Cancer (2), pulmonary (6), treatment related (2), unknown (2) | Cancer (1), severe BMF (1), pulmonary (4), treatment related (3), other/unknown (5) | NA                 | Cancer (4), severe BMF (1), hepatic (2), pulmonary (3), treatment related (2), other/unknown (2) | Severe BMF (3), pulmonary (2), treatment related (1), other (1) | Severe BMF (2), treatment related (2), hepatic (1), pulmonary (1), unknown (2) | Pulmonary (6), severe BMF (4), Cancer (4), treatment related (4), unknown (5) |
| <b>Hematopoietic cell transplant [%]</b>     | 5 [17.2]                                         | 4 [8.5]                                                       | 11 [36.7]                                                                           | 0                  | 15 [60]                                                                                          | 9 [60]                                                          | 6 [37.5]                                                                       | 12 [37.5]                                                                     |
| <b>Lung transplant [%]</b>                   | 0                                                | 3 [6.4]                                                       | 2 [6.7]                                                                             | 0                  | 2 [8]                                                                                            | 0                                                               | 0                                                                              | 0                                                                             |
| <b>Liver transplant [%]</b>                  | 0                                                | 1 [2.1]                                                       | 0                                                                                   | 0                  | 0                                                                                                | 2 [13.3]                                                        | 1 [6.3]                                                                        | 0                                                                             |
| <b>Severe bone marrow failure [%]</b>        | 4 [13.8]                                         | 12 [25.5]                                                     | 17 [56.7]                                                                           | 0                  | 19 [76]                                                                                          | 13 [86.7]                                                       | 11 [68.8]                                                                      | 20 [62.5]                                                                     |
| <b>Pulmonary fibrosis</b>                    |                                                  |                                                               |                                                                                     |                    |                                                                                                  |                                                                 |                                                                                |                                                                               |
| • <b>Prior to HCT [%]</b>                    | 1 [3.4]                                          | 11 [23.4]                                                     | 10 [33.3]                                                                           | 0                  | 2 [8]                                                                                            | 1 [6.7]                                                         | 3 [18.8]                                                                       | 2 [6.3]                                                                       |
| • <b>Following HCT [%]<sup>s</sup></b>       | 0                                                | 0                                                             | 1 [9.1]                                                                             | 0                  | 5 [33.3]                                                                                         | 3 [33.3]                                                        | 0                                                                              | 3 [25]                                                                        |
| <b>Pulmonary arteriovenous malformations</b> |                                                  |                                                               |                                                                                     |                    |                                                                                                  |                                                                 |                                                                                |                                                                               |
| • <b>Prior to HCT [%]</b>                    | 0                                                | 0                                                             | 0                                                                                   | 0                  | 0                                                                                                | 0                                                               | 1 [6.3]                                                                        | 0                                                                             |
| • <b>Following HCT [%]<sup>s</sup></b>       | 1 [20]                                           | 0                                                             | 0                                                                                   | 0                  | 4 [26.7]                                                                                         | 3 [33.3]                                                        | 2 [33.3]                                                                       | 1 [8.3]                                                                       |

|                                       | AD- <i>RTEL1</i> | AD- <i>TERT</i> | AD- <i>TERC</i> | AD- <i>PARN/ACD</i> | AD- <i>TINF2</i> | AR- <i>RTEL1</i> | AR-others | <i>DKC1</i> |
|---------------------------------------|------------------|-----------------|-----------------|---------------------|------------------|------------------|-----------|-------------|
| <b># of patients</b>                  | 29               | 47              | 30              | 6                   | 25               | 15               | 16        | 32          |
| <b>Severe liver disease</b>           |                  |                 |                 |                     |                  |                  |           |             |
| ○ Prior to HCT [%]                    | 0                | 2 [4.3]         | 0               | 0                   | 0                | 0                | 4 [25]    | 2 [6.3]     |
| ○ Following HCT [%] <sup>§</sup>      | 0                | 1 [25]          | 1 [9.1]         | 0                   | 3 [20]           | 2 [22.2]         | 1 [16.7]  | 0           |
| <b>Gastrointestinal complications</b> |                  |                 |                 |                     |                  |                  |           |             |
| ● Esophageal strictures [%]           | 0                | 1 [2.1]         | 1 [3.3]         | 0                   | 0                | 7 [46.7]         | 3 [18.8]  | 4 [12.5]    |
| ● GI telangiectasias                  |                  |                 |                 |                     |                  |                  |           |             |
| ○ Prior to HCT [%]                    | 0                | 2 [4.3]         | 0               | 0                   | 0                | 0                | 4 [25]    | 1 [3.1]     |
| ○ Following HCT [%] <sup>§</sup>      | 0                | 0               | 1 [9.1]         | 0                   | 2 [13.3]         | 1 [11.1]         | 1 [16.7]  | 0           |
| <b>Avascular osteonecrosis</b>        |                  |                 |                 |                     |                  |                  |           |             |
| ○ Prior to HCT [%]                    | 0                | 8 [17]          | 2 [6.7]         | 0                   | 2 [8]            | 0                | 3 [18.8]  | 4 [12.5]    |
| ○ Following HCT [%] <sup>§</sup>      | 2 [40]           | 1 [25]          | 0               | 0                   | 2 [13.3]         | 2 [22.2]         | 1 [16.7]  | 1 [8.3]     |
| <b>Myelodysplastic syndrome [%]</b>   | 0                | 4 [8.5]         | 8 [26.7]        | 0                   | 0                | 0                | 1 [6.3]   | 3 [9.4]     |
| <b>Cancer</b>                         |                  |                 |                 |                     |                  |                  |           |             |
| ○ Prior to HCT [%]                    | 1 [3.4]          | 6 [12.8]        | 6 [20]          | 0                   | 1 [4]            | 0                | 1 [6.3]   | 7 [21.9]    |
| ○ Following HCT [%] <sup>§</sup>      | 0                | 0               | 0               | 0                   | 3 [20]           | 1 [11.1]         | 0         | 1 [8.3]     |

<sup>§</sup> % of patients with HCT; AD, autosomal dominant; AR, autosomal recessive; HCT, hematopoietic cell transplantation; CI confidence interval; BMF, bone marrow failure

**Supplemental Table 8: Transplantation data and details on mortality in study participants stratified by inheritance pattern groups**

|                                      | Total            | AD-non <i>TINF2</i> | AR/XLR          | <i>TINF2</i>     | Unknown        |
|--------------------------------------|------------------|---------------------|-----------------|------------------|----------------|
| <b><u>Transplanted patients*</u></b> |                  |                     |                 |                  |                |
| Hematopoietic cell transplant (HCT)  |                  |                     |                 |                  |                |
| • # of patients,                     | 70               | 20                  | 27              | 15               | 8              |
| • median age in years (range)        | 15.44 (0.9-63.1) | 26.1 (2.2-63.1)     | 16.8 (0.9-34.7) | 5.7 (2.1-47.3)   | 9.4 (2.5-31.5) |
| ○ HCT type                           |                  |                     |                 |                  |                |
| ▪ MSD                                | 9                |                     |                 |                  |                |
| ▪ MUD                                | 51               |                     |                 |                  |                |
| ▪ MMUD                               | 1 (8/10)         |                     |                 |                  |                |
| ▪ CB                                 | 5                |                     |                 |                  |                |
| ▪ No information                     | 4                |                     |                 |                  |                |
| ○ Reason for transplant              |                  |                     |                 |                  |                |
| ▪ BMF                                | 57               |                     |                 |                  |                |
| ▪ BMF/AML                            | 3                |                     |                 |                  |                |
| ▪ BMF/MDS                            | 8                |                     |                 |                  |                |
| ▪ BMF/Immunodeficiency               | 2                |                     |                 |                  |                |
| Lung transplant                      |                  |                     |                 |                  |                |
| • # of patients,                     | 8                | 5                   | 0               | 2                | 1              |
| • median age in years (range)        | 51.4 (13.1-62.4) | 53.7 (32.5-62.4)    | NA              | 29.3 (13.1-45.5) | 52.1           |
| ○ Reason for transplant              | PF, PF/HPS       |                     |                 |                  |                |
| ○ Previous HCT                       | 2                | 1                   | 0               | 1                | 0              |
| Liver                                |                  |                     |                 |                  |                |
| • # of patients                      | 4                | 1                   | 3               | 0                | 0              |
| • median age in years (range)        | 27.8 (21-56.7)   |                     | 25.8 (21-29.8)  |                  |                |
| ○ Reason for transplant**            | HPS, HPS/LF      |                     |                 |                  |                |
| ○ Previous HCT                       | 2                | 0                   | 2               | 0                | 0              |

| <b>Deceased patients</b>                 |           |    |    |    |    |
|------------------------------------------|-----------|----|----|----|----|
| # of patients deceased at last follow up | 97        | 31 | 38 | 14 | 14 |
| Bone marrow failure                      | 15        | 1  | 9  | 1  | 4  |
| Pulmonary                                | 27        | 12 | 9  | 3  | 3  |
| Liver                                    | 3 (2 HPS) | 0  | 1  | 2  | 0  |
| Cancer                                   | 15        | 4  | 4  | 4  | 3  |
| Treatment related                        | 19        | 7  | 7  | 2  | 3  |
| Other                                    | 3         | 1  | 1  | 1  | 0  |
| Missing data                             | 15        | 6  | 7  | 1  | 1  |

\* One patient received kidney transplant for chronic kidney disease stage 4 due BK virus nephropathy with severe nephrosclerosis.

\*\* In one patient final diagnosis leading to liver transplant not documented.

Abbreviations: HCT, hematopoietic cell transplantation; MSD, matched sibling donor; MUD, matched unrelated donor; MMUD, mismatched unrelated donor; CB, cord blood; BMF, bone marrow failure; AML, acute myeloid leukemia; MDS, myelodysplastic syndrome; HPS, hepatopulmonary syndrome; LF, liver fibrosis; PF, pulmonary fibrosis.



**Supplemental Table 9**

| <b>Association</b>                                                                         | <b>OR* (p-value) without adjusting for telomere length</b> | <b>OR (p-value) with adjusting for telomere length (&lt;1st vs ≥1st percentile)</b> |
|--------------------------------------------------------------------------------------------|------------------------------------------------------------|-------------------------------------------------------------------------------------|
| <b>Severe bone marrow failure</b>                                                          | AR/XLR = 8.7 (<0.001)<br><i>TINF2</i> = 7.5 (<0.001)       | AR/XLR = 6.1 (<0.001)<br><i>TINF2</i> = 5.3 (0.004)                                 |
| <b>Pulmonary fibrosis (adjusted for age at DC diagnosis: pediatric vs adult)</b>           | AR/XLR = 1.6 (0.481)<br><i>TINF2</i> = 2.1 (0.422)         | AR/XLR = 1.8 (0.429)<br><i>TINF2</i> = 2.2 (0.388)                                  |
| <b>Severe liver disease (adjusted for sex and age at DC diagnosis: pediatric vs adult)</b> | AR/XLR = 7.6 (0.063)                                       | AR/XLR = 13.3 (0.048)                                                               |
| <b>Gastrointestinal telangiectasias</b>                                                    | AR/XLR = 3.2 (0.214)                                       | AR/XLR = 6.9 (0.108)                                                                |
| <b>Esophageal strictures (adjusted for age at DC diagnosis: pediatric vs adult)</b>        | AR/XLR = 3.4 (0.035)                                       | AR/XLR = 4.2 (0.026)                                                                |
| <b>AVN</b>                                                                                 | AR/XLR = 1.3 (0.663)                                       | AR/XLR = 0.9 (0.811)                                                                |
|                                                                                            | <b>HR (p-value) without adjusting for telomere length</b>  | <b>HR (p-value) with adjusting for telomere length (&lt;1st vs ≥1st percentile)</b> |
| <b>Cancer risk (adjusted for sex and age at DC diagnosis: pediatric vs adult)</b>          | AR/XLR = 10.7 (0.007)                                      | AR/XLR = 5.5 (0.056)                                                                |
| <b>Mortality risk</b>                                                                      | AR/XLR/ <i>TINF2</i> = 7.4 (<0.001)                        | AR/XLR/ <i>TINF2</i> = 4.8 (<0.001)                                                 |

All clinical complications with no prior hematopoietic cell transplantation. Reference group is AD-non*TINF2* for all analyses except for esophageal strictures, where AR/XLR is compared with *TINF2* and AD-non*TINF2* combined. OR's and HRs are not equal to the ones reported in the manuscript because those with TL measurements are a subset (n=146 with known genotype and TL measurement available) of the cohort used in the manuscript (n=200 with known genotype). OR, Odds ratio; HR, hazard ratio.

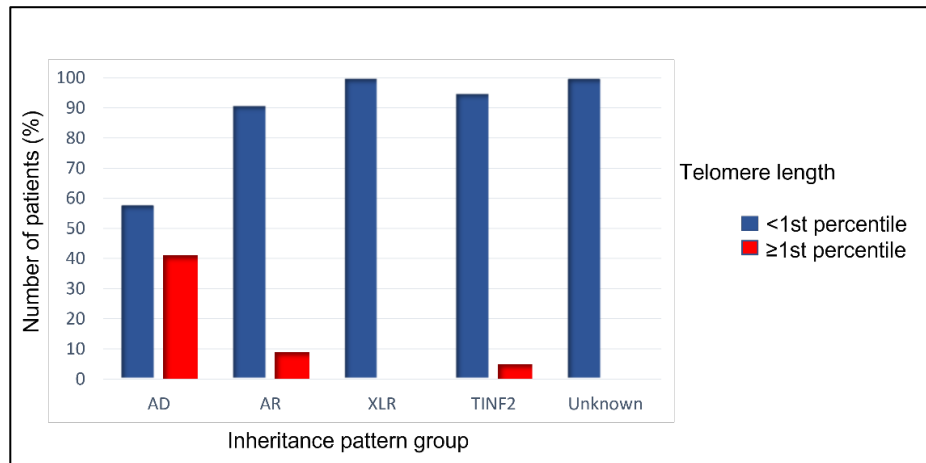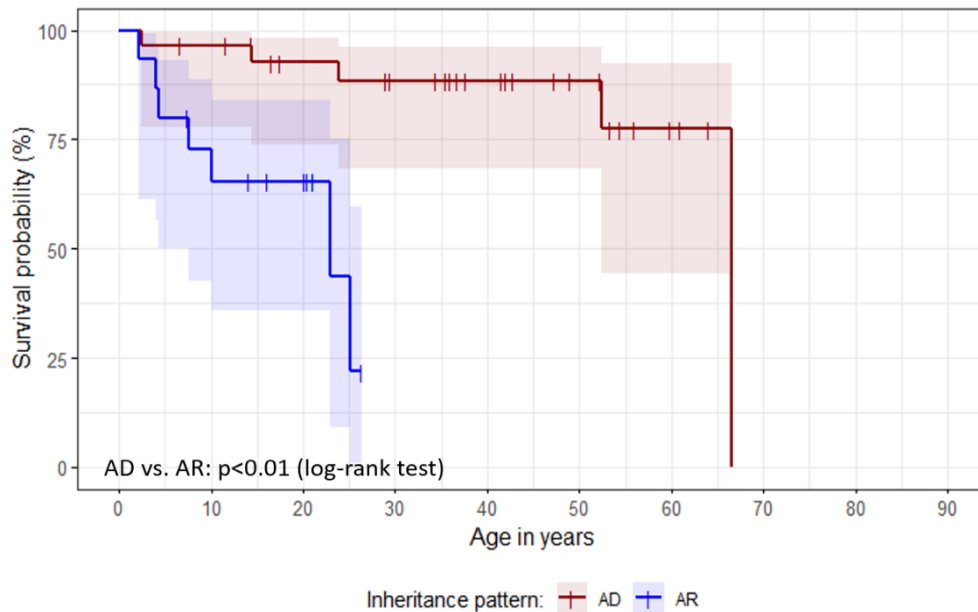

**Supplemental Figure 3:** Overall survival of individuals with autosomal dominant (AD) telomere biology disorders versus individuals with either autosomal recessive (AR), X-linked (XLR) or *TINF2* associated telomere biology disorders. AD group including (A) or excluding (B) 25 family members with heterozygous pathogenic variants and the index case having autosomal recessive disease.

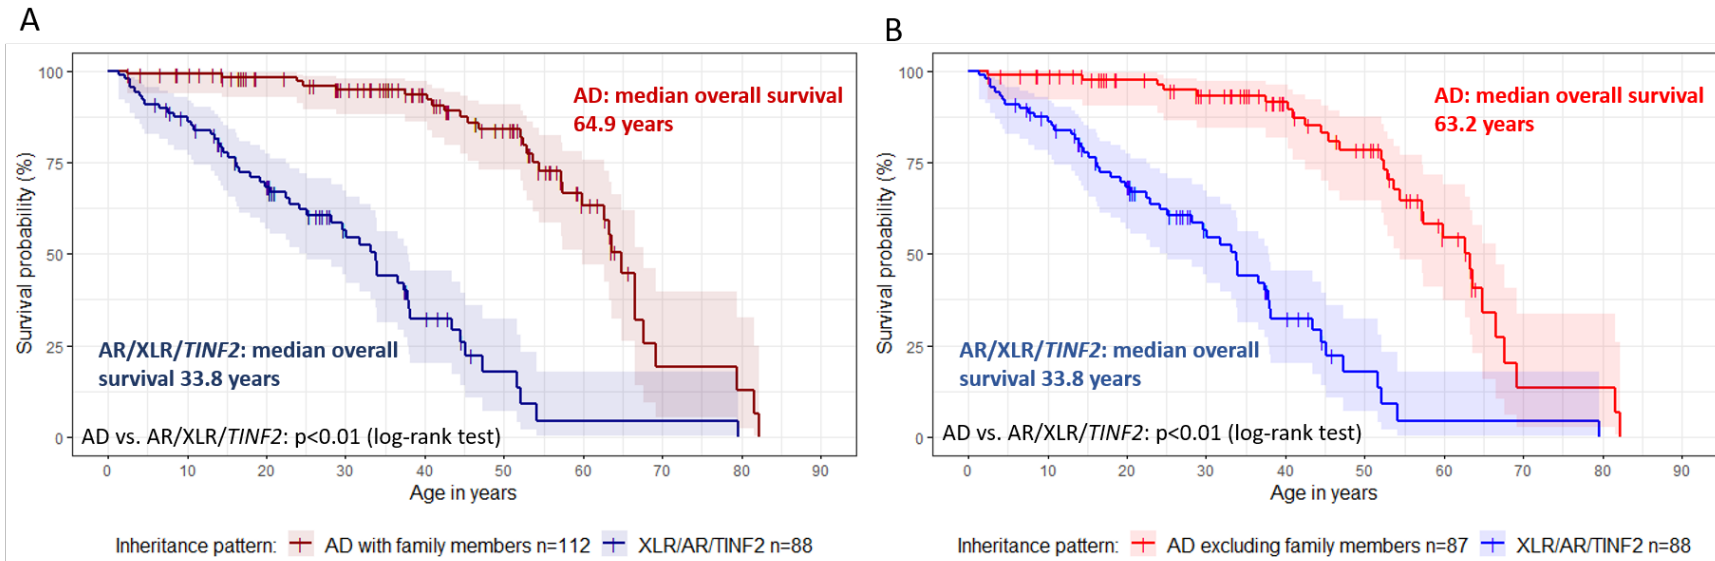

## Supplemental Data References

- 1 Dokal, I., Vulliamy, T., Mason, P. & Bessler, M. Clinical utility gene card for: Dyskeratosis congenita - update 2015. *Eur J Hum Genet* **23**, doi:10.1038/ejhg.2014.170 (2015).
- 2 Khincha, P. P., Wentzensen, I. M., Giri, N., Alter, B. P. & Savage, S. A. Response to androgen therapy in patients with dyskeratosis congenita. *Br J Haematol* **165**, 349-357, doi:10.1111/bjh.12748 (2014).
- 3 VarSeq™ (Version 8.x) [Software]. (Bozeman, MT: Golden Helix, Inc. Available from <http://www.goldenhelix.com>).
- 4 Kopanos, C. *et al.* VarSome: the human genomic variant search engine. *Bioinformatics* **35**, 1978-1980, doi:10.1093/bioinformatics/bty897 (2019).
- 5 Feurstein, S. *et al.* Telomere biology disorder prevalence and phenotypes in adults with familial hematologic and/or pulmonary presentations. *Blood Adv* **4**, 4873-4886, doi:10.1182/bloodadvances.2020001721 (2020).
- 6 Abou Tayoun, A. N. *et al.* Recommendations for interpreting the loss of function PVS1 ACMG/AMP variant criterion. *Hum Mutat* **39**, 1517-1524, doi:10.1002/humu.23626 (2018).
- 7 Strande, N. T. *et al.* Evaluating the Clinical Validity of Gene-Disease Associations: An Evidence-Based Framework Developed by the Clinical Genome Resource. *Am J Hum Genet* **100**, 895-906, doi:10.1016/j.ajhg.2017.04.015 (2017).
- 8 Landrum, M. J. & Kattman, B. L. ClinVar at five years: Delivering on the promise. *Hum Mutat* **39**, 1623-1630, doi:10.1002/humu.23641 (2018).
- 9 Landrum, M. J. *et al.* ClinVar: improving access to variant interpretations and supporting evidence. *Nucleic Acids Res* **46**, D1062-d1067, doi:10.1093/nar/gkx1153 (2018).
- 10 Brnich, S. E. *et al.* Recommendations for application of the functional evidence PS3/BS3 criterion using the ACMG/AMP sequence variant interpretation framework. *Genome Med* **12**, 3, doi:10.1186/s13073-019-0690-2 (2019).
- 11 Gelb, B. D. *et al.* ClinGen's RASopathy Expert Panel consensus methods for variant interpretation. *Genet Med* **20**, 1334-1345, doi:10.1038/gim.2018.3 (2018).
- 12 Gussow, A. B., Petrovski, S., Wang, Q., Allen, A. S. & Goldstein, D. B. The intolerance to functional genetic variation of protein domains predicts the localization of pathogenic mutations within genes. *Genome Biol* **17**, 9, doi:10.1186/s13059-016-0869-4 (2016).
- 13 Nykamp, K. *et al.* Sherlock: a comprehensive refinement of the ACMG-AMP variant classification criteria. *Genet Med* **19**, 1105-1117, doi:10.1038/gim.2017.37 (2017).
- 14 Jarvik, G. P. & Browning, B. L. Consideration of Cosegregation in the Pathogenicity Classification of Genomic Variants. *Am J Hum Genet* **98**, 1077-1081, doi:10.1016/j.ajhg.2016.04.003 (2016).
- 15 Lek, M. *et al.* Analysis of protein-coding genetic variation in 60,706 humans. *Nature* **536**, 285-291, doi:10.1038/nature19057 (2016).
- 16 Gunning, A. C. *et al.* Assessing performance of pathogenicity predictors using clinically relevant variant datasets. *J Med Genet*, doi:10.1136/jmedgenet-2020-107003 (2020).
- 17 Tian, Y. *et al.* REVEL and BayesDel outperform other in silico meta-predictors for clinical variant classification. *Sci Rep* **9**, 12752, doi:10.1038/s41598-019-49224-8 (2019).

- 18 Mohiyuddin, M. *et al.* MetaSV: an accurate and integrative structural-variant caller for next generation sequencing. *Bioinformatics* **31**, 2741-2744, doi:10.1093/bioinformatics/btv204 (2015).
- 19 Biesecker, L. G. & Harrison, S. M. The ACMG/AMP reputable source criteria for the interpretation of sequence variants. *Genet Med* **20**, 1687-1688, doi:10.1038/gim.2018.42 (2018).
- 20 Niewisch, M. R. & Savage, S. A. An update on the biology and management of dyskeratosis congenita and related telomere biology disorders. *Expert Rev Hematol* **12**, 1037-1052, doi:10.1080/17474086.2019.1662720 (2019).
